# Supplementary material
Source: publisher figshare collection journal article supplement (https://gsajournals.figshare.com/ndownloader/files/17930519)
Supplement: Supplementary file 1 [file 17930519]

| **Table S2** Analyses of variance on olfactory behavioral responses to selection for each odorant at the end of selection. | | | | | | |
| --- | --- | --- | --- | --- | --- | --- |
| **Odorant** | **Generation** | **Term** | **df** | **S.S.** | ***F*** | ***P*** |
| BUT | 30 | Selection | 2 | 4.0851 | 75.777 | **0.0001** |
|  |  | Line (Selection) | 6 | 0.1530 | 0.9462 | 0.4720 |
| CYC | 30 | Selection | 2 | 3.4619 | 70.986 | **0.0001** |
|  |  | Line (Selection) | 6 | 0.1750 | 1.1964 | 0.3256 |
| Degrees of freedom (df), Sum of Squares (S.S.), *F* ratio (*F*), and *P*-value (*P*). | | | | | | |
| Significant terms in bold. | | | | | | |
